# Supplementary material for: Early diphtheria-tetanus-pertussis vaccination associated with higher female mortality and no difference in male mortality in a cohort of low birthweight children: an observational study within a randomised trial
Source: HighWire-hosted journal article supplement (doi:10.1136/archdischild-2011-300646), 2012-02-13
Supplement: archdischild-2011-300646_ds1.pdf [file archdischild-2011-300646_ds1.pdf]

**Appendix table. Causes of death among children who died between 2 and 6 months of age according to sex**

| Category                                          | Boys | Girls |
|---------------------------------------------------|------|-------|
| Respiratory problems                              | 7    | 8     |
| Malaria and anaemia                               | 5    | 5     |
| Diarrhoea, vomiting and gastrointestinal problems | 6    | 4     |
| Septicaemia                                       |      | 1     |
| Malnutrition                                      | 3    | 3     |
| Congenital problems #                             | 1    | 1     |
| Other problems *                                  |      | 3     |
| No information (family moved)                     | 1    | 2     |
| Total                                             | 23   | 27    |

Notes: # possible cardiopathy, hydrocephalus; \* hepatitis, meningoencephalitis, sudden death;
